# Supplementary material
Source: PubMed Central journal article supplement (PMC4467832)
Supplement: NIHMS695973-supplement-A.pdf [file NIHMS695973-supplement-A.pdf]

## **Appendix A**

### **Medication Dosing and Monitoring for pJIA CTPs**

#### **Glucocorticoids**

##### **A. Glucocorticoid exposure prior to starting on CTP**

###### **i. Intraarticular glucocorticoid injections**

- IAS prior to starting on CTP is not an exclusion criterion, and number of joints injected and date(s) will be documented (dose, which joints will not be)

###### **ii. Systemic glucocorticoids (oral)**

- Allowed for an indication other than pJIA, but will document dose and when started
- Glucocorticoids need not be discontinued prior to starting

##### **B. Glucocorticoid use during CTP**

###### **i. Systemic glucocorticoids**

- Starting dose per provider's discretion, but encourage lowest possible dose for the shortest period of time
- Tapers per systemic JIA CTP rapid taper (1 month) (recommend but not required). See Appendix B.
- Encourage rapid taper (should be off or on very low dose steroid by 3 months)

ii. Intraarticular glucocorticoids injections

- IAS will be allowed during CTPs at provider's discretion (document number and date only)

## Non-Biologic DMARDs

### Methotrexate

A. Route<sup>1-5</sup>

- Oral or subcutaneous dosing allowed (reminder that subcutaneous route may have fewer side effects, better absorption and improved efficacy at doses greater than 10 mg/m<sup>2</sup>)

B. Dose<sup>1, 2, 6-10</sup>

- Initial target dose should be reached by 6 weeks: 10-15 mg/m<sup>2</sup>/week or 0.5 mg/kg/week
- Maximum recommended dose at any time: 25 mg
- Dose adjustments allowed based on response and tolerability after 4-8 weeks on therapy.

C. Toxicity monitoring<sup>11, 12</sup>

- Check CBC, LFTs (AST, ALT), and creatinine prior to initiation, approximately 1 month after initiation, approximately 1-2 months after an increase in dose, repeat every 3-4 months if prior results are normal and dose is stable.

- Consider hepatitis B screening at baseline
- Consider PPD or interferon gamma release assay prior to starting

D. Other issues:

Side effects to capture: nausea, vomiting, and abdominal pain

## **Leflunomide**

A. Loading dose

- No loading dose recommended.

B. Maintenance dose<sup>13-16</sup>

- <20kg-10 mg every other day
- 20-30kg-10 mg/d
- 30-40kg-10mg/d alternating 20mg/d
- >40kg-20 mg/d

Target dose may be reached with incremental dosing over 4-6 weeks

C. Toxicity monitoring<sup>12, 17</sup>

Same as methotrexate:

- Check CBC, LFTs (AST, ALT), and creatinine prior to initiation, approximately 1 month after initiation, approximately 1-2 months after an increase in dose, repeat every 3-4 months if prior results are normal and dose is stable.

- Consider hepatitis B screening at baseline

#### D. Other issues

- Side effects to capture: diarrhea, hair loss

### **Sulfasalazine**

#### A. Dosing<sup>18-20</sup>

- 30-50 mg/kg/day up to recommended dose of 2 grams/day  
(maximum 3 grams/day)

#### B. Toxicity monitoring:

Same as methotrexate:

- Check CBC, LFTs (AST, ALT) and creatinine prior to initiation, approximately 1 month after initiation, approximately 1-2 months after an increase in dose, repeat every 3-4 months if prior results are normal and dose is stable.
- Consider hepatitis B screening at baseline

Reminder that hemolytic anemia (associated with glucose-6-phosphate dehydrogenase deficiency), Stevens Johnson Syndrome, and DRESS syndrome\* have been reported in patients taking SSZ.

\*DRESS syndrome – Rash, eosinophilia at least one of the following: enlarged LN, hepatitis (transaminases or AST, ALT >2X

upper limit of normal), interstitial nephropathy, lung disease or myocardial involvement

## **Biologic DMARDs**

### **General Guidelines**

#### A. Dosing

Minimum starting doses provided. Adjustments at provider's discretion.

#### B. Toxicity Monitoring

- Complete blood count, liver enzymes, serum creatinine prior to initiation
  - Repeat approximately every 4- 6 months if prior results normal and dose stable
- TB screen prior to initiation (PPD or TB quantiferon gold)
  - Repeat approximately once yearly
  - If positive, need chest Xray and treatment per infectious diseases prior to initiating treatment (usually at least 4-6 weeks of treatment)
- Consider screening for hepatitis B prior to initiation

#### C. Other recommendations

- Avoid live vaccinations while on biologic agents
- Avoid combinations of biologic agents

## Tumor necrosis factor- $\alpha$ inhibitors

### A. Dosing

- Etanercept - 0.4 mg/ kg sq twice weekly (maximum 25 mg)/ or 0.8 mg/ kg sq weekly (maximum 50 mg)<sup>21, 22</sup>
- Infliximab - 5-10 mg/kg iv 0,2,6 q 4-8 weekly<sup>17, 23</sup>
- Adalimumab<sup>24</sup>
  - 15-30 kg -- 20 mg sq every other week
  - $\geq$  30 kg -- 40 mg sq every other week
- Certolizumab<sup>25</sup> - Dose in RA may be used for those 18yr or older
  - 400 mg/dose at 0,2 and 4 week then 200 mg sc every 2 week

Or

  - 400mg/dose at 0, 2, 4 week then 400 mg sc every 4 weeks
- Golimumab<sup>26</sup> - Dose in RA may be used for those 18yr or older
  - 50 mg monthly subcutaneous injection

\*\*will update when pediatric trial results available

### B. Special monitoring recommendations for tumor necrosis factor- $\alpha$ inhibitors

- Consider screening for histoplasmosis, blastomycosis, coccidiomycosis in endemic areas

### C. Special other considerations for tumor necrosis factor- $\alpha$ inhibitors

- Recommend discussion of the FDA malignancy risk warning as part of routine counseling prior to initiation of therapy
- DMARD use is recommended but not required with infliximab to avoid human antichimeric antibody development

## **Abatacept**

### A. Dosing<sup>27, 28</sup>

- IV
  - 10mg/kg up to 1000mg Q2 weeks for 3 doses, then Q4 weeks
  - Children above 75kg -- follow adult dosing schedule below.
  - Adult dosing—
    - <60kg 500mg
    - 60-100kg-750mg
    - >100kg-100mg
- SQ (based on RA dosing)<sup>29</sup>
  - Loading IV dose as above (for weight), then 125 mg SC within a day, followed by 125 mg SC once a week
  - Dose recommendations from pediatric trial will be added when available.

## **Rituximab**

### A. Dosing<sup>30</sup>

- 750 mg/m<sup>2</sup>/dose iv infusion every 2 weeks X 2 doses (max 1 gm), repeat every 4-8 months

#### B. Special toxicity monitoring<sup>17, 31</sup>

- Consider monitoring serum IgG and IgM levels, circulating B cell numbers
- Consider IVIG replacement therapy if hypogammaglobulinemia develops

#### C. Special other considerations

- Consider vaccination of children prior to initiation of therapy due to poor ability to mount immune response once therapy started, avoid live vaccines on therapy
- Consider re-dosing based on response in 4-8 months

### **Tocilizumab**

#### A. Dosing<sup>32</sup>

- <30 kg -- 10 mg/kg q 4 weeks
- >30 kg -- 8 mg/kg q 4 weeks

#### B. Special Toxicity Monitoring

- Total neutrophil count, platelets, ALT and AST at the time of the 2nd infusion and then monthly
- Lipid level (Total cholesterol, HDL, LDL, triglycerides) monitoring 1-2 months following initiation of therapy, then at 6 month intervals.

## REFERENCES

1. Cespedes-Cruz A, Gutierrez-Suarez R, Pistorio A, et al. Methotrexate improves the health-related quality of life of children with juvenile idiopathic arthritis. *Ann Rheum Dis*. Mar 2008;67(3):309-314.
2. Ruperto N, Murray KJ, Gerloni V, et al. A randomized trial of parenteral methotrexate comparing an intermediate dose with a higher dose in children with juvenile idiopathic arthritis who failed to respond to standard doses of methotrexate. *Arthritis Rheum*. Jul 2004;50(7):2191-2201.
3. Ravelli A, Gerloni V, Corona F, et al. Oral versus intramuscular methotrexate in juvenile chronic arthritis. Italian Pediatric Rheumatology Study Group. *Clin Exp Rheumatol*. Mar-Apr 1998;16(2):181-183.
4. Alsufyani K, Ortiz-Alvarez O, Cabral DA, Tucker LB, Petty RE, Malleson PN. The role of subcutaneous administration of methotrexate in children with juvenile idiopathic arthritis who have failed oral methotrexate. *J Rheumatol*. Jan 2004;31(1):179-182.
5. Tukova J, Chladek J, Nemcova D, Chladkova J, Dolezalova P. Methotrexate bioavailability after oral and subcutaneous administration in children with juvenile idiopathic arthritis. *Clin Exp Rheumatol*. Nov-Dec 2009;27(6):1047-1053.
6. Becker ML, Rose CD, Cron RQ, Sherry DD, Bilker WB, Lautenbach E. Effectiveness and toxicity of methotrexate in juvenile idiopathic arthritis: comparison of 2 initial dosing regimens. *J Rheumatol*. Apr 2010;37(4):870-875.
7. Giannini EH, Brewer EJ, Kuzmina N, et al. Methotrexate in resistant juvenile rheumatoid arthritis. Results of the U.S.A.-U.S.S.R. double-blind, placebo-controlled trial. The Pediatric Rheumatology Collaborative Study Group and The Cooperative Children's Study Group. *N Engl J Med*. Apr 16 1992;326(16):1043-1049.
8. Reiff A, Shaham B, Wood BP, Bernstein BH, Stanley P, Szer IS. High dose methotrexate in the treatment of refractory juvenile rheumatoid arthritis. *Clin Exp Rheumatol*. Jan-Feb 1995;13(1):113-118.
9. Tynjala P, Vahasalo P, Tarkiainen M, et al. Aggressive combination drug therapy in very early polyarticular juvenile idiopathic arthritis (ACUTE-JIA): a multicentre randomised open-label clinical trial. *Ann Rheum Dis*. Sep 2011;70(9):1605-1612.
10. Wallace CA, Giannini EH, Spalding SJ, et al. Trial of early aggressive therapy in polyarticular juvenile idiopathic arthritis. *Arthritis Rheum*. Dec 19 2011.
11. Kocharla L, Taylor J, Weiler T, Ting TV, Luggen M, Brunner HI. Monitoring methotrexate toxicity in juvenile idiopathic arthritis. *J Rheumatol*. Dec 2009;36(12):2813-2818.
12. Beukelman T, Patkar NM, Saag KG, et al. 2011 American College of Rheumatology recommendations for the treatment of juvenile idiopathic arthritis: initiation and safety monitoring of therapeutic agents for the treatment of arthritis and systemic features. *Arthritis Care Res (Hoboken)*. Apr 2011;63(4):465-482.

13. Silverman E, Mouy R, Spiegel L, et al. Leflunomide or methotrexate for juvenile rheumatoid arthritis. *N Engl J Med*. Apr 21 2005;352(16):1655-1666.
14. Silverman E, Spiegel L, Hawkins D, et al. Long-term open-label preliminary study of the safety and efficacy of leflunomide in patients with polyarticular-course juvenile rheumatoid arthritis. *Arthritis Rheum*. Feb 2005;52(2):554-562.
15. Foeldvari I, Wierk A. Effectiveness of leflunomide in patients with juvenile idiopathic arthritis in clinical practice. *J Rheumatol*. Aug 1 2010;37(8):1763-1767.
16. Shi J, Kovacs SJ, Wang Y, Ludden TM, Bhargava VO. Population pharmacokinetics of the active metabolite of leflunomide in pediatric subjects with polyarticular course juvenile rheumatoid arthritis. *J Pharmacokinetic Pharmacodyn*. Aug 2005;32(3-4):419-439.
17. Cassidy JT, Petty RE, Laxer RM, Lindsley CB. *Textbook of Pediatric Rheumatology*. 6th ed. Philadelphia, PA: Saunders Elsevier; 2010.
18. Ansell BM, Hall MA, Loftus JK, et al. A multicentre pilot study of sulphasalazine in juvenile chronic arthritis. *Clin Exp Rheumatol*. Mar-Apr 1991;9(2):201-203.
19. Huang JL, Chen LC. Sulphasalazine in the treatment of children with chronic arthritis. *Clin Rheumatol*. 1998;17(5):359-363.
20. Burgos-Vargas R, Vazquez-Mellado J, Pacheco-Tena C, Hernandez-Garduno A, Goycochea-Robles MV. A 26 week randomised, double blind, placebo controlled exploratory study of sulfasalazine in juvenile onset spondyloarthropathies. *Ann Rheum Dis*. Oct 2002;61(10):941-942.
21. Lovell DJ, Giannini EH, Reiff A, et al. Etanercept in children with polyarticular juvenile rheumatoid arthritis. Pediatric Rheumatology Collaborative Study Group. *N Engl J Med*. Mar 16 2000;342(11):763-769.
22. Lovell DJ, Giannini EH, Reiff A, et al. Long-term efficacy and safety of etanercept in children with polyarticular-course juvenile rheumatoid arthritis: interim results from an ongoing multicenter, open-label, extended-treatment trial. *Arthritis Rheum*. Jan 2003;48(1):218-226.
23. Ruperto N, Lovell DJ, Cuttica R, et al. A randomized, placebo-controlled trial of infliximab plus methotrexate for the treatment of polyarticular-course juvenile rheumatoid arthritis. *Arthritis Rheum*. Sep 2007;56(9):3096-3106.
24. Lovell DJ, Ruperto N, Goodman S, et al. Adalimumab with or without methotrexate in juvenile rheumatoid arthritis. *N Engl J Med*. Aug 21 2008;359(8):810-820.
25. [http://www.cimzia.com/pdf/Prescribing\\_Information.pdf](http://www.cimzia.com/pdf/Prescribing_Information.pdf). Accessed July 23, 2013.
26. <http://www.simponi.com/prescribing-information.pdf>. Accessed July 23, 2013.
27. Ruperto N, Lovell DJ, Quartier P, et al. Long-term safety and efficacy of abatacept in children with juvenile idiopathic arthritis. *Arthritis Rheum*. Jun 2010;62(6):1792-1802.
28. Ruperto N, Lovell DJ, Quartier P, et al. Abatacept in children with juvenile idiopathic arthritis: a randomised, double-blind, placebo-controlled withdrawal trial. *Lancet*. Aug 2 2008;372(9636):383-391.
29. [http://packageinserts.bms.com/pi/pi\\_orencia.pdf](http://packageinserts.bms.com/pi/pi_orencia.pdf). Accessed July 23, 2013.

30. Alexeeva EI, Valieva SI, Bzarova TM, et al. Efficacy and safety of repeat courses of rituximab treatment in patients with severe refractory juvenile idiopathic arthritis. *Clin Rheumatol*. Sep 2011;30(9):1163-1172.
31. Buch MH, Smolen JS, Betteridge N, et al. Updated consensus statement on the use of rituximab in patients with rheumatoid arthritis. *Ann Rheum Dis*. Jun 2011;70(6):909-920.
32. [http://www.gene.com/download/pdf/actemra\\_prescribing.pdf](http://www.gene.com/download/pdf/actemra_prescribing.pdf). Accessed July 23, 2013.
