# Supplementary material
Source: PubMed Central journal article supplement (PMC4467832)
Supplement: NIHMS695973-supplement-B.pdf [file NIHMS695973-supplement-B.pdf]

## Appendix B. Suggested glucocorticoid tapering regimens

All doses at each time point are suggested targets. It is anticipated that tapering of dose to reach the next target will occur between time points. Each suggested option below illustrates reduction in prednisone dose by at least half or more of starting dose by month 3.

| <b>Option 1</b>                                                    |                  |                  |                  |                  |                  |            |                                 |
|--------------------------------------------------------------------|------------------|------------------|------------------|------------------|------------------|------------|---------------------------------|
| <b>Low dose: Starting dose 0.2 mg/kg with rapid taper: 2 weeks</b> |                  |                  |                  |                  |                  |            |                                 |
| <b>Weight in kilograms</b>                                         | <b>10-&lt;20</b> | <b>20-&lt;30</b> | <b>30-&lt;40</b> | <b>40-&lt;50</b> | <b>50-&lt;60</b> | <b>≥60</b> | <b>Weight-based target dose</b> |
| 0 weeks                                                            | 2.5              | 5                | 7.5              | 10               | 12.5             | 20         | 0.25 mg/kg (max 20 mg)          |
| 1 week                                                             | 1.5              | 2.5              | 5                | 7.5              | 10               | 15         | 0.125 mg/kg                     |
| 1 1/2 week                                                         | 0.5              | 1                | 1.5              | 2                | 2.5              | 3          | 0.05 mg/kg                      |
| 2 weeks                                                            | 0                | 0                | 0                | 0                | 0                | 0          | off                             |

**Option 2**

**Medium Dose: Starting dose 0.5 mg/kg with fast taper: One month**

| <b>Weight in kilograms</b> | <b>10-&lt;20</b> | <b>20-&lt;30</b> | <b>30-&lt;40</b> | <b>40-&lt;50</b> | <b>50-&lt;60</b> | <b>≥60</b> | <b>Weight-based target dose</b> |
|----------------------------|------------------|------------------|------------------|------------------|------------------|------------|---------------------------------|
| 0 weeks                    | 5                | 10               | 15               | 20               | 25               | 30         | 0.5 mg/kg (max 30 mg)           |
| 1 weeks                    | 4                | 7.5              | 12.5             | 15               | 20               | 25         | 0.4 mg/kg                       |
| 2 weeks                    | 2.5              | 5                | 7.5              | 10               | 12.5             | 15         | 0.25 mg/kg                      |
| 3 weeks                    | 1                | 2                | 3                | 4                | 5                | 6          | 0.1 mg/kg                       |
| 4 weeks                    | 0                | 0                | 0                | 0                | 0                | 0          | off                             |

**Option 3**

**High Dose: Starting dose 1 mg/kg with fast taper: One month**

| <b>Weight in kilograms</b> | <b>10-&lt;20</b> | <b>20-&lt;30</b> | <b>30-&lt;40</b> | <b>40-&lt;50</b> | <b>50-&lt;60</b> | <b>≥60</b> | <b>Weight-based target dose</b> |
|----------------------------|------------------|------------------|------------------|------------------|------------------|------------|---------------------------------|
| 0 weeks                    | 10               | 20               | 30               | 40               | 50               | 60         | 1 mg/kg (max 60 mg)             |
| 1 weeks                    | 7.5              | 15               | 22.5             | 30               | 37.5             | 45         | 0.75 mg/kg                      |
| 2 weeks                    | 5                | 10               | 15               | 20               | 25               | 30         | 0.5 mg/kg                       |
| 3 weeks                    | 2.5              | 5                | 7.5              | 10               | 12.5             | 15         | 0.25 mg/kg                      |
| 4 weeks                    | 0                | 0                | 0                | 0                | 0                | 0          | off                             |

**Option 4**

**Starting dose 1mg/kg with slow taper: Three months**

| <b>Weight in kilograms</b> | <b>10-&lt;20</b> | <b>20-&lt;30</b> | <b>30-&lt;40</b> | <b>40-&lt;50</b> | <b>50-&lt;60</b> | <b>≥60</b> | <b>Weight-based target dose</b> |
|----------------------------|------------------|------------------|------------------|------------------|------------------|------------|---------------------------------|
| 0 weeks                    | 10               | 20               | 30               | 40               | 50               | 60         | 1 mg/kg (max 60mg)              |
| 2 weeks                    | 7.5              | 15               | 22.5             | 30               | 37.5             | 45         | 0.75 mg/kg                      |
| 1 month                    | 5                | 10               | 15               | 20               | 25               | 30         | 0.5 mg/kg                       |
| 2 months                   | 2.5              | 7.5              | 7.5              | 10               | 12.5             | 15         | 0.25 mg/kg                      |
| 3 months                   | 0                | 0                | 0                | 0                | 0                | 0          | off                             |
